# Supplementary material for: Behavioral Plasticity in Response to Environmental Manipulation among Zebrafish (Danio rerio) Populations
Source: PLoS One. 2015 Apr 30;10(4):e0125097. doi: 10.1371/journal.pone.0125097 (PMC4415955; doi:10.1371/journal.pone.0125097)
Supplement: S2 File — (XLS) [file pone.0125097.s002.xls]

## Sheet: AggressionBoxPlot
S2 File. Aggression (number of chases) measurements for the populations (U, PN, SH) across the four tank treatments (tank1, Tank2, Tank3, Tank4)
Population	Tank1	Tank2	Tank3	Tank4
U	3	4	13	13
U	6	11	0	9
U	47	7	1	47
U	88	12	14	88
U	16	8	0	97
U	61	5	3	94
U	27	12	0	25
U	18	46	0	9
U	21	8	1	16
U	29	16	16	24
U	26	2	2	29
U	52	12	12	20
U	18	0	5	18
U	15	0	6	55
U	97	15	0	10
U	41	63	0	14
PN	6	33	0	25
PN	5	36	1	36
PN	5	16	0	33
PN	9	5	1	39
PN	68	18	8	39
PN	21	20	4	41
PN	0	30	1	91
PN	17	51	1	56
PN	12	47	0	25
PN	18	8	0	19
PN	2	31	0	50
PN	20	22	2	74
SH	18	35	0	27
SH	8	31	0	77
SH	0	28	0	26
SH	2	51	1	16
SH	15	4	0	25
SH	15	34	0	22
SH	19	4	0	96
SH	73	15	0	16
SH	2	47	0	69
SH	16	61	2	62
SH	14	41	1	96
SH	0	57	0	73
